# Supplementary material for: Tuning the Co pre-oxidation process of Co3O4via geometrically reconstructed F–Co–O active sites for boosting acidic water oxidation
Source: Royal Society of Chemistry journal article supplement (doi:10.1039/d4ee03982c), 2024-01-01
Supplement: d4ee03982c1.pdf [file d4ee03982c1.pdf]

Supplementary Information for

**Tuning the Co pre-oxidation process of Co<sub>3</sub>O<sub>4</sub> via geometrically reconstructed F–Co–O active sites for boosting acidic water oxidation**

Yi Wang,<sup>‡, a, b, g</sup> Pu Guo,<sup>‡, a, g</sup> Jing Zhou,<sup>c</sup> Bing Bai,<sup>a, b, g</sup> Yifan Li,<sup>d, e</sup> Mingrun Li,<sup>a, g</sup> Pratteek Das,<sup>a, g</sup> Xianhong Wu,<sup>a, g</sup> Linjuan Zhang,<sup>c, f</sup> Yi Cui,<sup>d, e</sup> Jianping Xiao,<sup>\* a, b, g</sup> and Zhong-Shuai Wu<sup>\* a, b, g</sup>

<sup>a</sup> *State Key Laboratory of Catalysis, Dalian Institute of Chemical Physics, Chinese Academy of Sciences, 457 Zhongshan Road, Dalian 116023, China*

<sup>b</sup> *University of Chinese Academy of Sciences, 19 A Yuquan Road, Shijingshan District, Beijing 100049, China*

<sup>c</sup> *Key Laboratory of Interfacial Physics and Technology, Shanghai Institute of Applied Physics, Chinese Academy of Sciences, Shanghai 201800, China*

<sup>d</sup> *Vacuum Interconnected Nanotech Workstation, Suzhou Institute of Nano-Tech and Nano-Bionics, Chinese Academy of Sciences, Suzhou, 215123, China*

<sup>e</sup> *School of Nano Technology and Nano Bionics University of Science and Technology of China, Hefei 230026, China*

<sup>f</sup> *Institute of Chemical and Engineering Sciences, A\*STAR, Singapore 627833, Singapore*

<sup>g</sup> *Dalian National Laboratory for Clean Energy, Chinese Academy of Sciences, 457 Zhongshan Road, Dalian 116023, China*

† *Electronic Supplementary Information (ESI) available: See DOI: 10.1039/x0xx00000x*

‡ These authors contributed equally to this work.

\*Corresponding author(s): xiao@dicp.ac.cn (J. P. Xiao); wuzs@dicp.ac.cn (Z.-S. Wu)

## Materials and Methods

### Synthesis of $\text{Co}_3\text{O}_{4-x}\text{F}_x$

First, 45 mg  $\text{Co}(\text{NO}_3)_3 \cdot 6\text{H}_2\text{O}$  and 2.25 mg  $\text{NH}_4\text{F}$  were added in 100  $\mu\text{L}$   $\text{H}_2\text{O}$  and  $\text{C}_2\text{H}_5\text{OH}$  mixed solution, and then treated with sonication. Then, a  $1 \times 2 \text{ cm}^2$  hydrophilic carbon paper was placed on a hotplate under  $90^\circ\text{C}$ . Next, the above mixture was sprayed on it, followed by calcination on a hotplate at  $90^\circ\text{C}$  in the air for 2 h. Finally, the electrode precursor material was annealed in air at  $400^\circ\text{C}$  for 2 h to obtain the  $\text{Co}_3\text{O}_{4-x}\text{F}_x$  catalyst, with the doping content of  $\sim 7 \text{ wt}\%$ .

The  $\text{Co}_3\text{O}_4$  catalyst was synthesized following a similar protocol without adding  $\text{NH}_4\text{F}$ .

### Materials characterization

The SEM images and EDS were obtained on a JSM-7800F microscope. TEM, HRTEM, HAADF-STEM images, and elemental mapping images were taken with ARM300 microscope with a spherical aberration corrector. XRD data were collected on a SmartLab using  $\text{Cu } K\alpha$  radiation. XPS spectra were conducted on the Hermo Scientific *K*-Alpha instrument. *Quasi in-situ* XPS spectra were collected at the SPECS NAP-XPS instrument attached to the glove box through a vacuum channel. Raman spectroscopy was recorded by Renishaw inVia confocal Raman microscope with excitation laser wavelength of 532 nm. TOF-SIMS measurements were performed using ABI MALDI TOF/TOF 5800 instrument. Elemental-specific XAS data were collected in the BL12B and BL14W1 beamlines of the Hefei National Synchrotron Radiation Laboratory (NSRL) and Shanghai Synchrotron Radiation Facility (SSRF) in China, respectively.

### Electrochemical measurements

The electrochemical performance was tested on a CHI 760E workstation at ambient temperature and pressure. In a typical three-electrode system, a carbon paper ( $1 \text{ cm}^2$ ), the  $\text{Hg}/\text{Hg}_2\text{SO}_4$  electrode and graphite rod were employed as the working, reference and counter electrodes, respectively. LSV curves were performed in an  $\text{O}_2$ -saturated  $0.5 \text{ M } \text{H}_2\text{SO}_4$  solution at a scan rate of  $10 \text{ mV s}^{-1}$ , without *IR* drop compensation. The potentials measured were converted to reversible hydrogen electrode (RHE) according

to the following equation:  $E_{\text{RHE}} = E_{\text{Hg}/\text{Hg}_2\text{SO}_4} + 0.059 \text{ pH} + 0.656$ , where the pH value is 0.3 for the 0.5 M  $\text{H}_2\text{SO}_4$  solution.

The measurement of PEM water electrolysis was performed on the self-made cell with membrane electrode assemblies (MEAs) at 50 °C, which mainly contains bipolar plate, gas diffusion layer (GDL), Nafion®117 polymer membrane (DuPont), commercial Pt/C (20 wt%) cathode catalyst and  $\text{Co}_3\text{O}_{4-x}\text{F}_x$  catalyst. Specifically, around  $1 \text{ mg cm}^{-2}$  of Pt/C (20 wt%) catalyst was uniformly sprayed onto the polymer membrane as the cathode. For the anode, the OER catalyst of  $\text{Co}_3\text{O}_{4-x}\text{F}_x$  was directly synthesized on carbon paper (TGP-H-060) with a loading of  $\sim 3 \text{ mg cm}^{-2}$ . Carbon paper (AvCarb) and titanium felt are used as the GDL for the cathode and anode, respectively. And the chronopotentiometric curve was not IR corrected.

### **Theoretical analysis.**

All the DFT calculations were performed with the Vienna *ab initio* simulation package.<sup>1</sup> The optimized geometries of the computational models are shown in Table S4. The projector-augmented wave method was performed as the basis set with the cut-off energy of 400 eV and Perdew–Burke–Ernzerhof (PBE) exchange-correlation functional<sup>2</sup> was applied to the optimization of all structures. The effects of the Hubbard  $U$  corrections were considered, where  $U$  values (employed as  $U - J$ ) of 3.0 were applied for Co.<sup>3</sup> The smearing (0.2 eV) based on the method of Methfessel–Paxton<sup>4</sup> was applied to the total energy calculations. The optimized lattice parameter  $a = b = c = 8.106 \text{ \AA}$  was used for  $\text{Co}_3\text{O}_4$ , which is consistent with the experimental measurements. The Monkhorst–Pack  $k$  points of  $4 \times 4 \times 4$  were applied for the bulk optimization of  $\text{Co}_3\text{O}_4$  (24 Co atoms and 32 O atoms). The  $\text{Co}_3\text{O}_4$  (311) surface was modeled by a slab of 4 layers with a  $(1 \times 1)$  unit. The  $\text{Co}_3\text{O}_4$ (110) surface was modeled by a slab of 4 bi-layers with a  $(1 \times 1)$  unit. The (311) and (110) surfaces were studied with Monkhorst–Pack  $k$  points of  $(1 \times 2 \times 1)$  and  $(3 \times 2 \times 1)$ , respectively. We calculated the different F-doping sites and chose the most stable one (Table S4). The force convergence was set to  $0.05 \text{ eV \AA}^{-1}$ . In addition, the computational hydrogen electrode approximation was used to describe the chemical potential of  $\text{OH}^-$  (Table S5) and free energies were corrected to the temperature of 298 K (Table S6). The implicit solvent effect was

considered.<sup>5, 6</sup>

We calculated the adsorption free energies of O\*, OH\* and OOH\* on the eight active sites (Figure S22 and Table S5) of Co<sub>3</sub>O<sub>4</sub> and Co<sub>3</sub>O<sub>4-x</sub>F<sub>x</sub>. The adsorption free energies of O\* ( $G_{\text{ad}} \text{O}^*$ ) and OOH\* ( $G_{\text{ad}} \text{OOH}^*$ ) were chosen as descriptors to establish the two-dimensional maps (Figure S23).

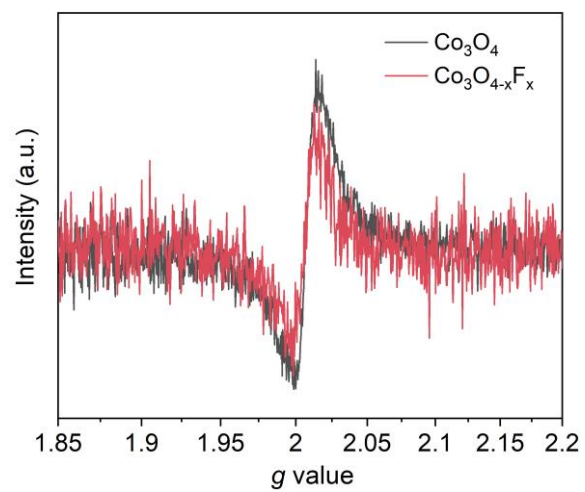

**Fig. S1** EPR spectra of  $\text{Co}_3\text{O}_4$  and  $\text{Co}_3\text{O}_{4-x}\text{F}_x$ .

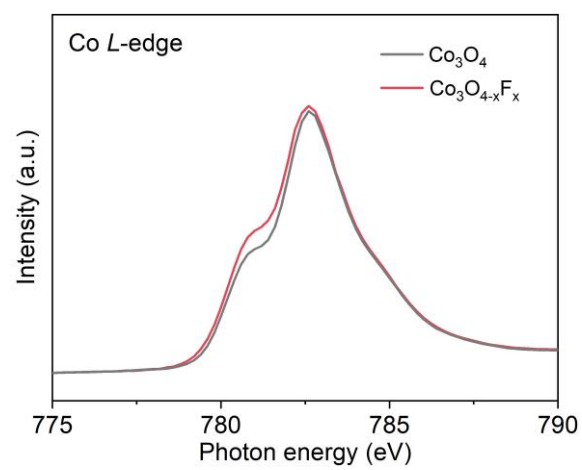

**Fig. S2** Co *L*-edge XAS spectra of  $\text{Co}_3\text{O}_4$  and  $\text{Co}_3\text{O}_{4-x}\text{F}_x$ .

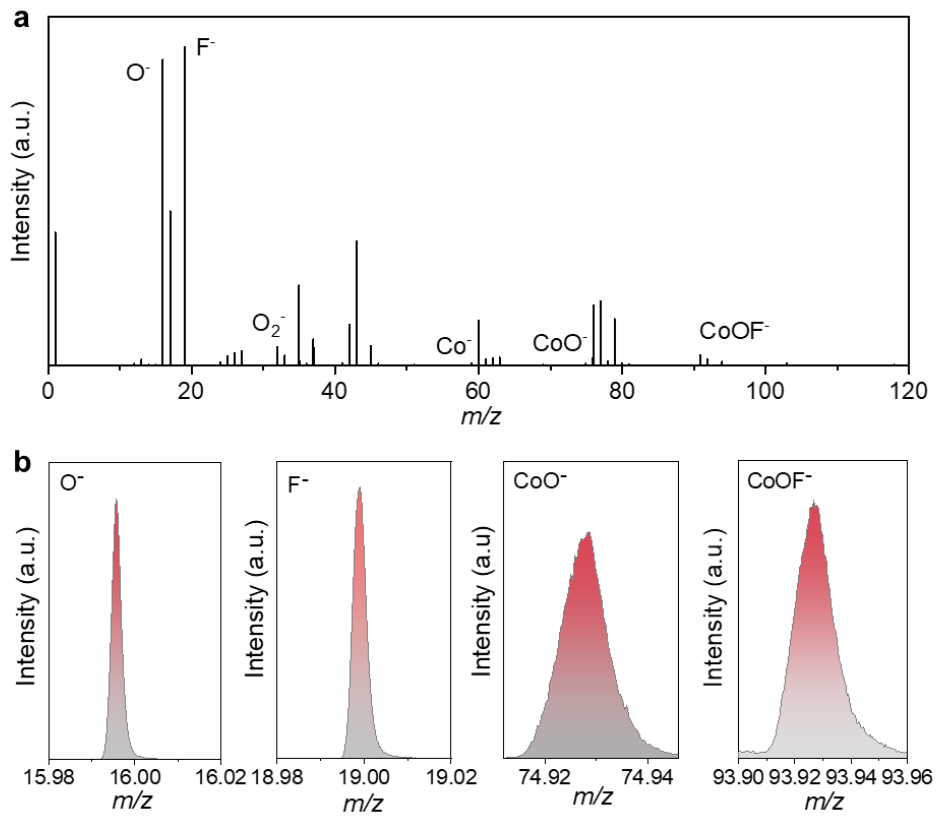

**Fig. S3** TOF-SIMS spectra of  $Co_3O_{4-x}F_x$ .

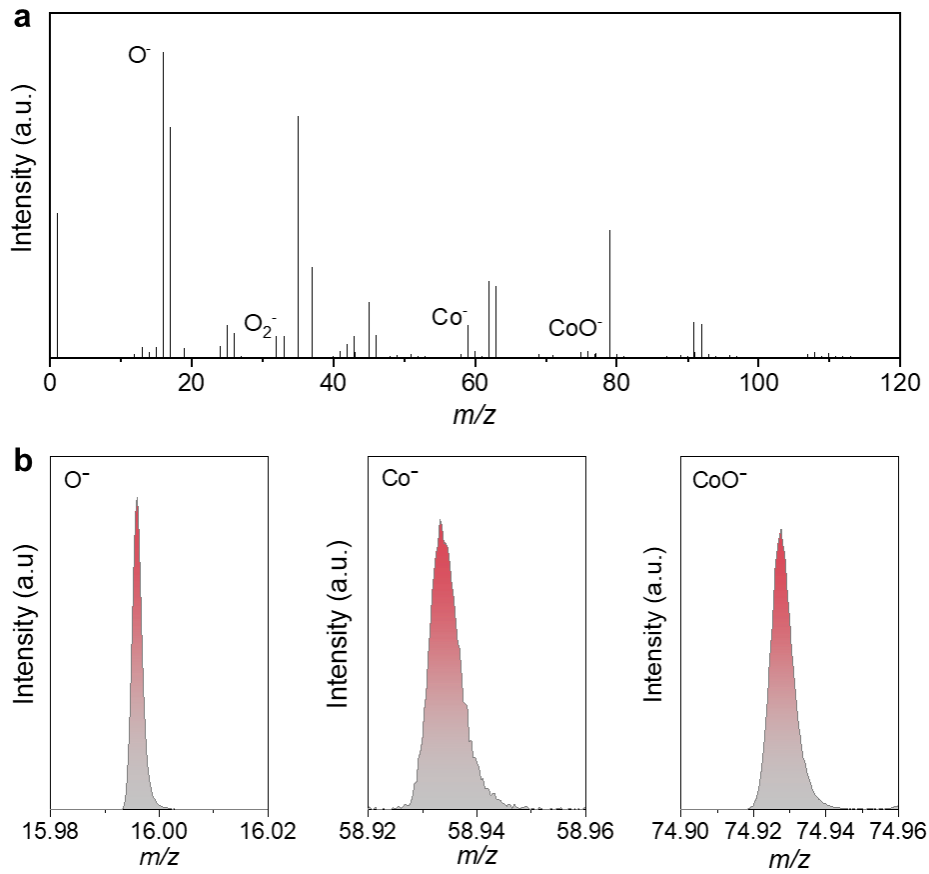

**Fig. S4** TOF-SIMS spectra of  $Co_3O_4$ .



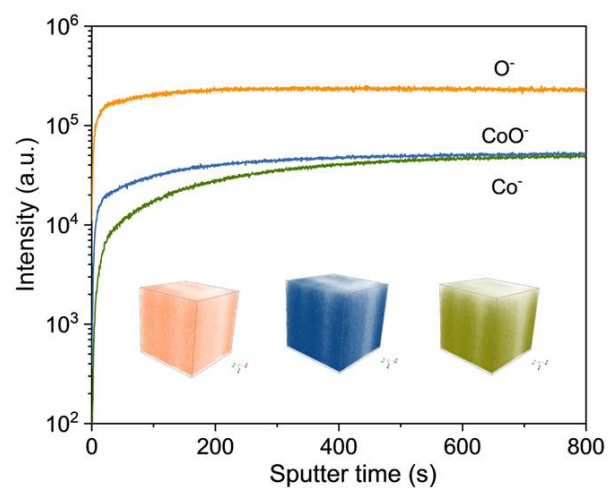

**Fig. S5** Unnormalized TOF-SIMS depth profiles of  $O^-$ ,  $Co^-$ , and  $CoO^-$  for  $Co_3O_4$ .

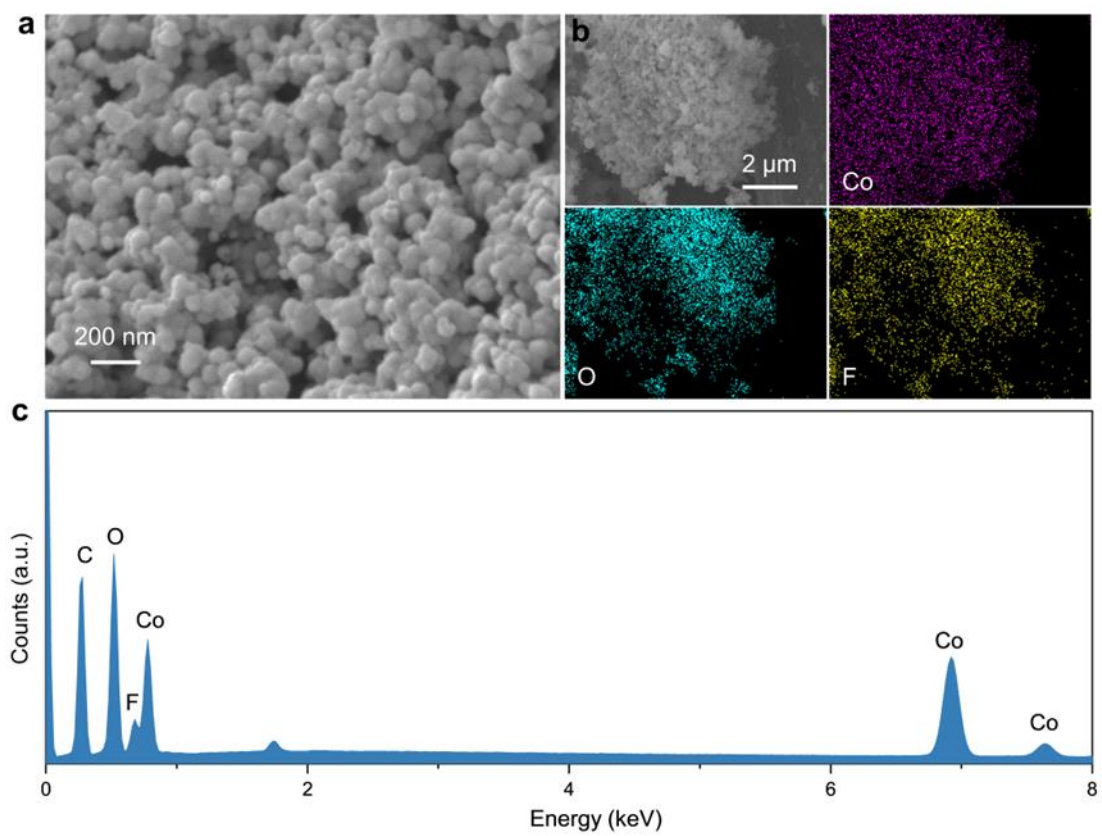

**Fig. S6** (a-c) SEM image (a), elemental mapping images (b), and EDX spectrum (c) of  $\text{Co}_3\text{O}_{4-x}\text{F}_x$ .

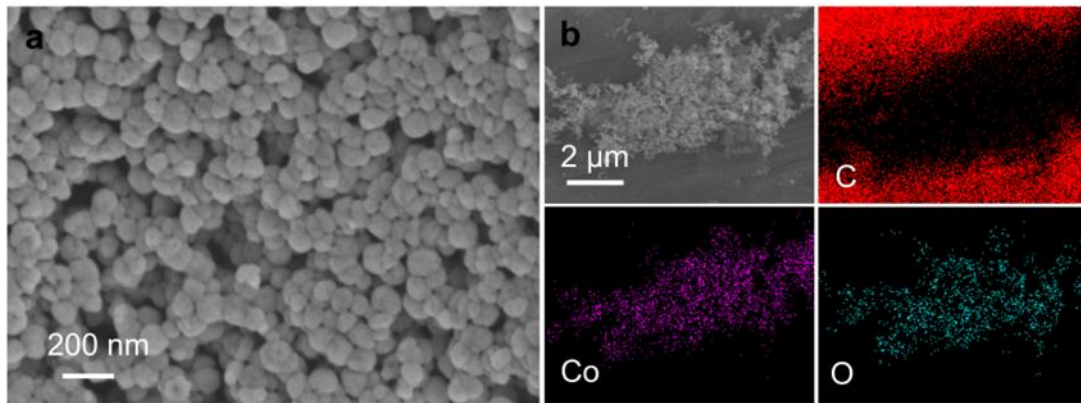

**Fig. S7** (a, b) SEM image (a) and elemental mapping images (b) of the  $\text{Co}_3\text{O}_4$ .

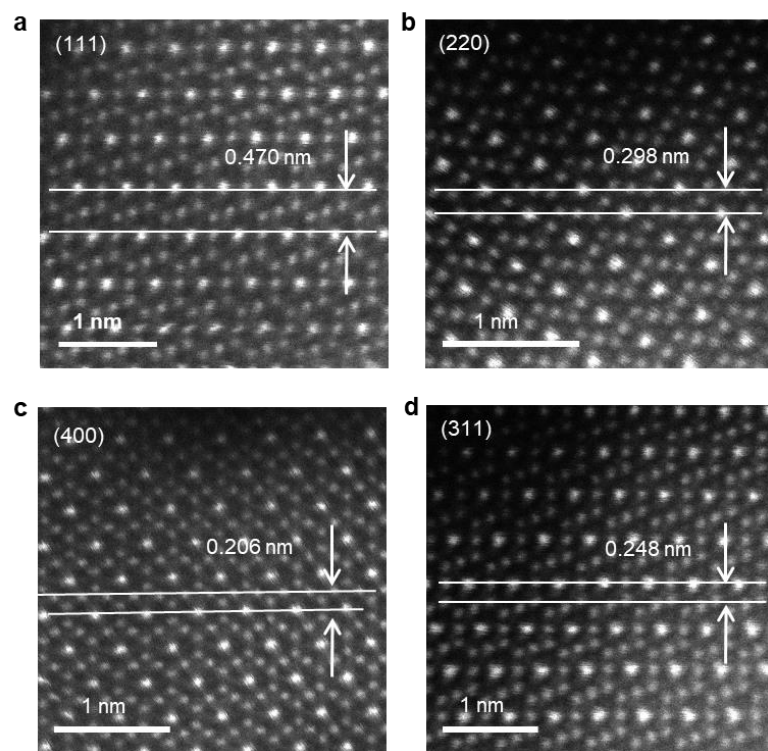

**Fig. S8** HAADF-STEM image of (111, a), (220, b), (400, c) and (311, d) crystal planes for  $\text{Co}_3\text{O}_{4-x}\text{F}_x$ .

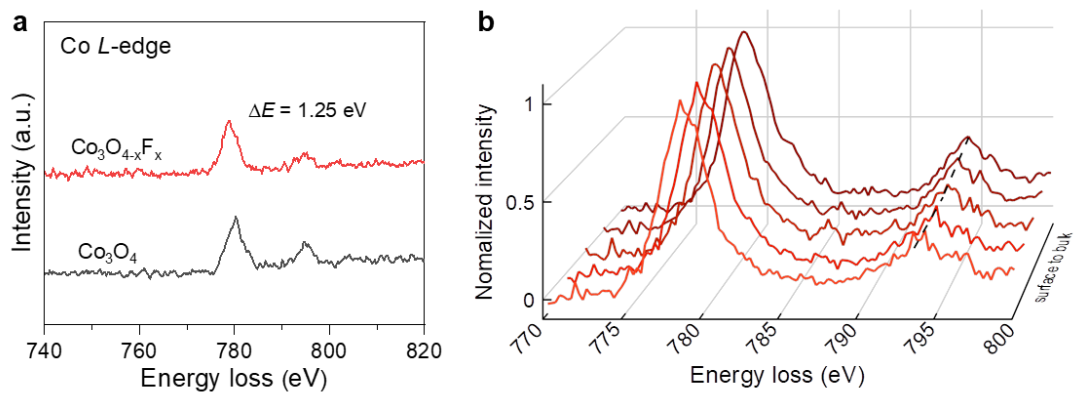

**Fig. S9** (a) EELS spectra of Co L-edges of  $\text{Co}_3\text{O}_4$  and  $\text{Co}_3\text{O}_{4-x}\text{F}_x$ . (b) The EELS spectra of Co L-edges from surface to bulk for  $\text{Co}_3\text{O}_{4-x}\text{F}_x$ .

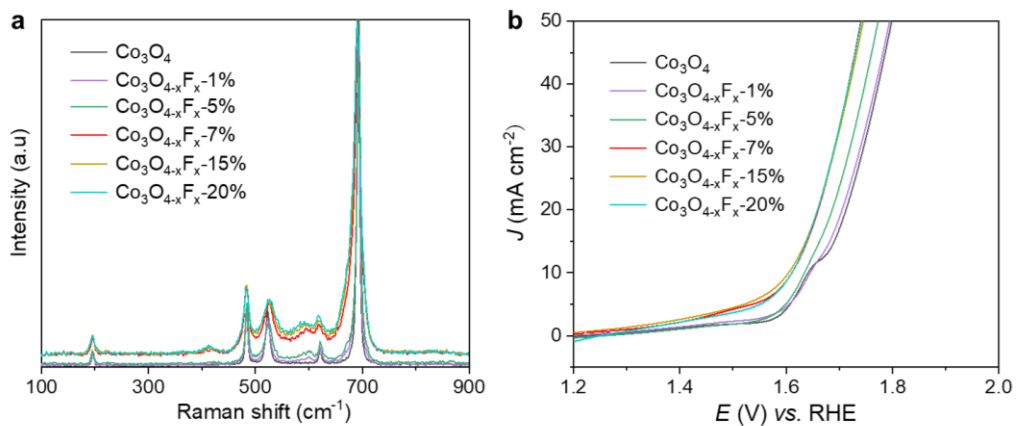

**Fig. S10** (a, b) The Raman spectra (a) and LSV curves without *IR* correction (b) of Co<sub>3</sub>O<sub>4</sub> and Co<sub>3</sub>O<sub>4-x</sub>F<sub>x</sub> with different F content.

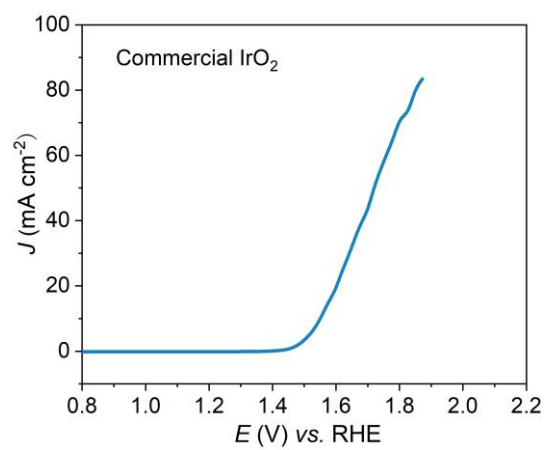

**Fig. S11** LSV polarization curve of commercial IrO<sub>2</sub> without *IR* correction.

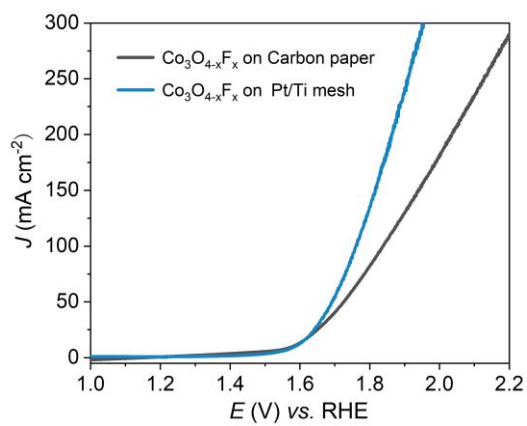

**Fig. S12** LSV polarization curves of  $\text{Co}_3\text{O}_{4-x}\text{F}_x$  on carbon paper or Pt/Ti mesh support without  $IR$  correction.



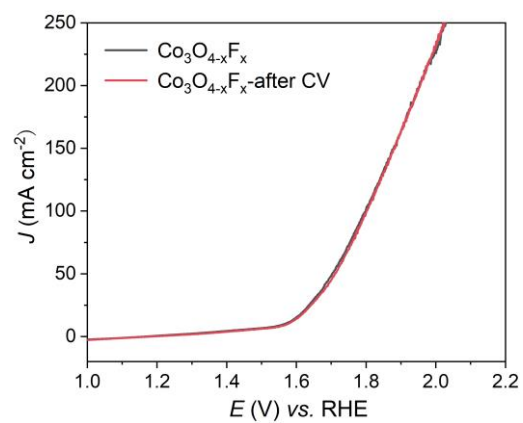

**Fig. S13** LSV polarization curves of  $\text{Co}_3\text{O}_{4-x}\text{F}_x$  before and after 2000 cycles potential cycling during OER without  $IR$  correction.

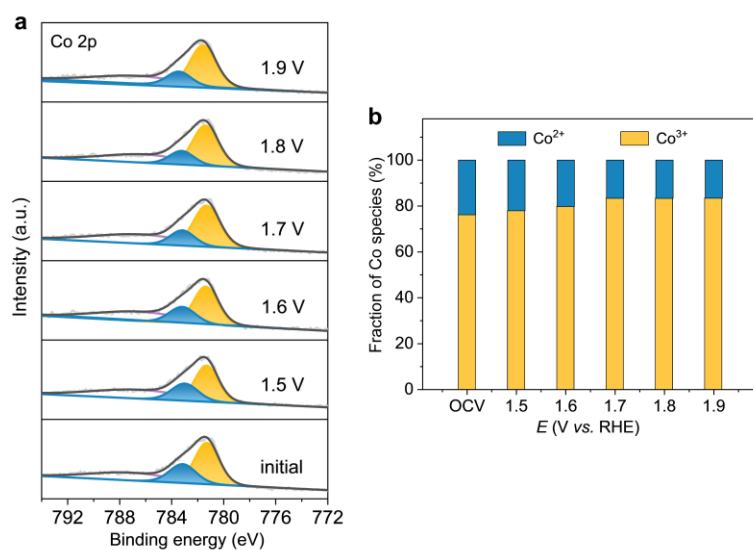

**Fig. S14** (a) The *quasi in-situ* Co 2p XPS spectra recorded of the resultant Co<sub>3</sub>O<sub>4</sub> during the multi-potential steps. (b) Fraction of Co species recorded of the resultant Co<sub>3</sub>O<sub>4</sub> from *quasi in-situ* Co 2p XPS spectra (a).

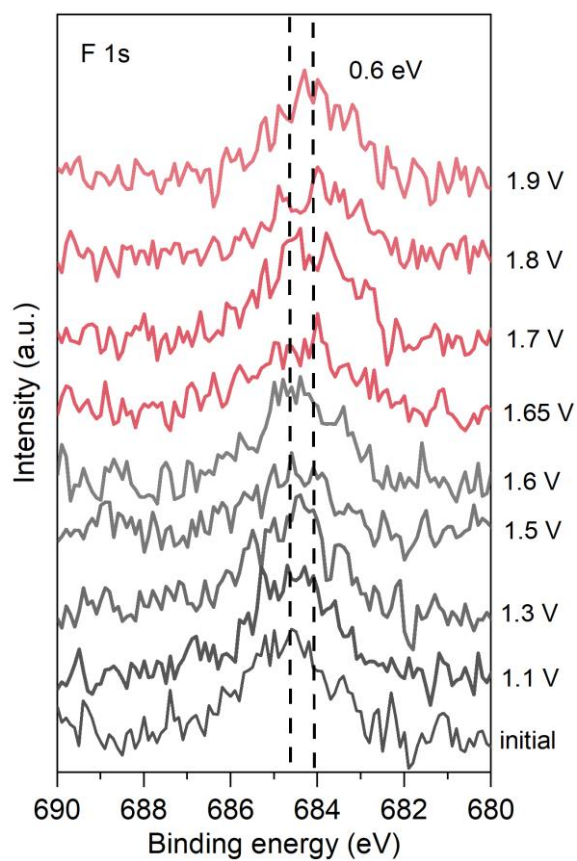

**Fig. S15** The *quasi in-situ* F 1s XPS spectra recorded of the resultant  $\text{Co}_3\text{O}_{4-x}\text{F}_x$  during the multi-potential steps.

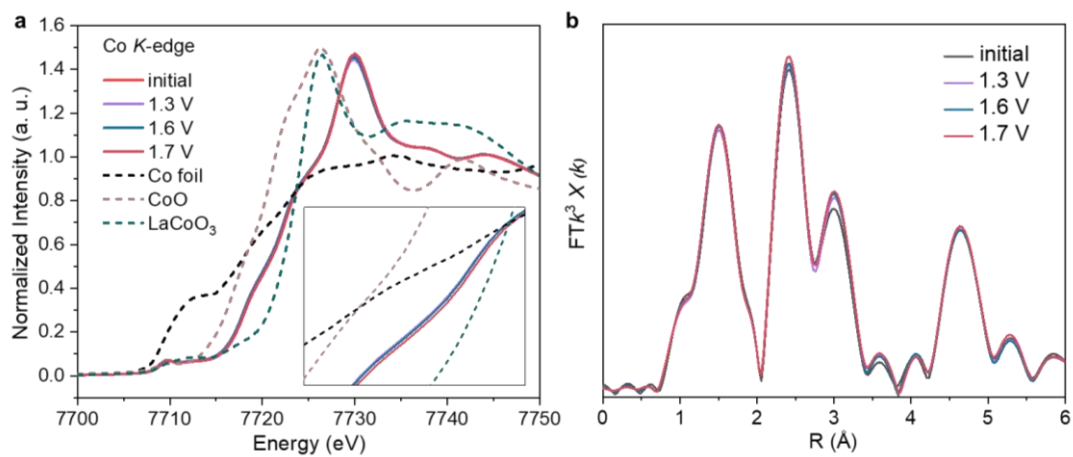

**Fig. S16** (a, b) *Ex-situ* XAS (a) and FT-EXAFS (b) spectra of change of the Co K-edge for Co<sub>3</sub>O<sub>4</sub> recorded during the multi-potential steps.

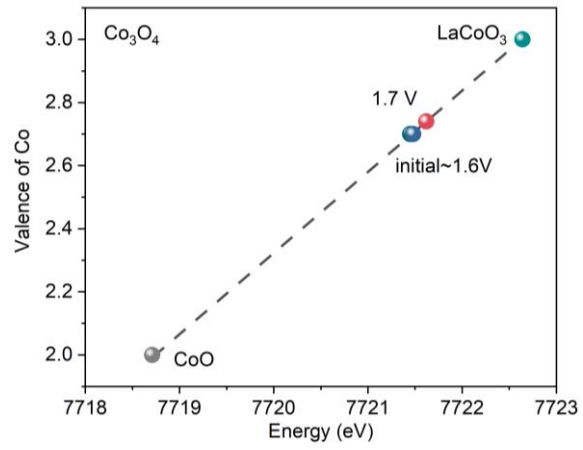

**Fig. S17** Co oxidation state as a function of absorption edge energy for  $\text{Co}_3\text{O}_4$  during the multi-potential steps.

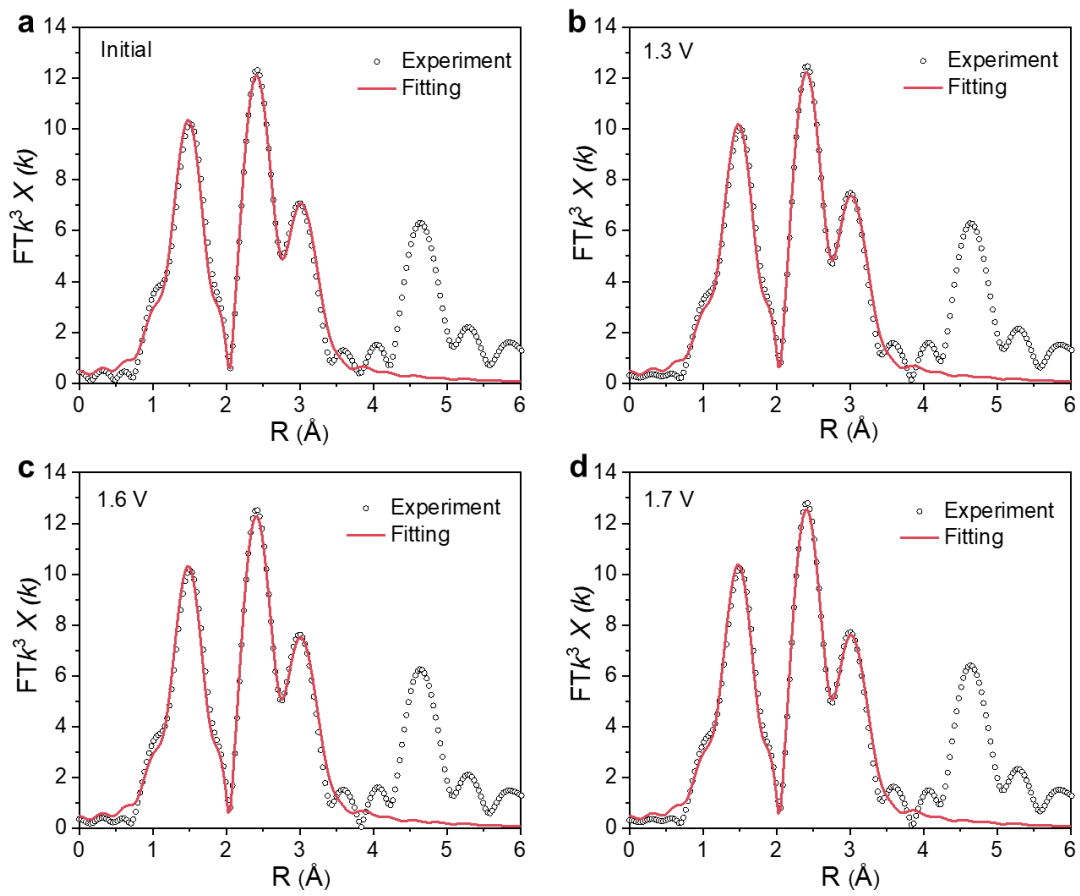

**Fig. S18**  $k^3$ -weighted R-space Co K-edge experimental and fitting spectra of  $\text{Co}_3\text{O}_4$  during the multi-potential steps.

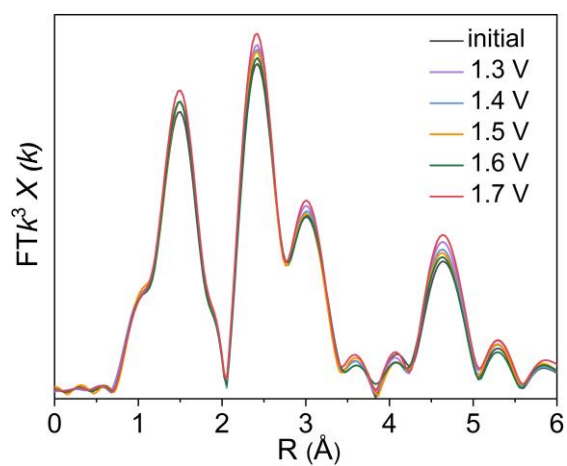

**Fig. S19** *Ex-situ* FT-EXAFS spectra of the Co *K*-edge for  $\text{Co}_3\text{O}_{4-x}\text{F}_x$  recorded during the multi-potential steps.

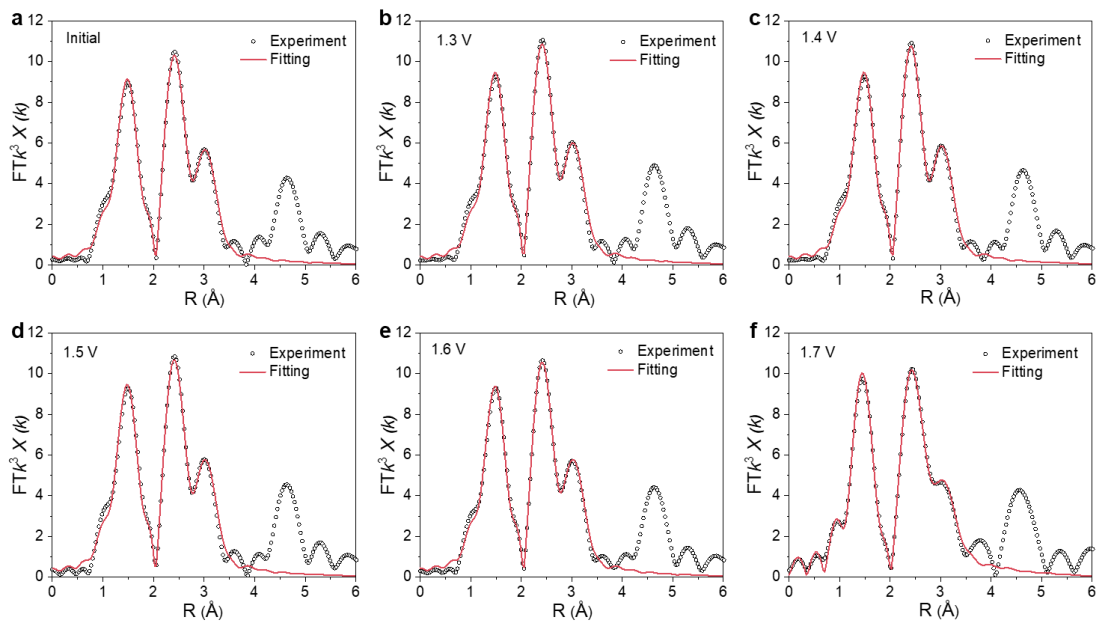

**Fig. S20**  $k^3$ -weighted R-space Co K-edge experimental and fitting spectra of  $\text{Co}_3\text{O}_{4-x}\text{F}_x$  during the multi-potential steps.



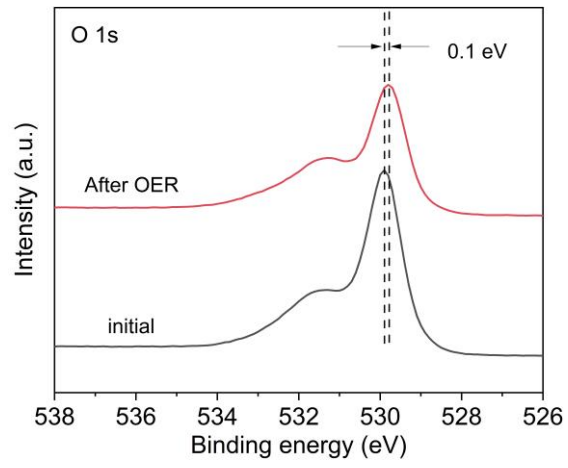

**Fig. S21** *Ex-situ* O 1s XPS spectra of  $\text{Co}_3\text{O}_{4-x}\text{F}_x$ .

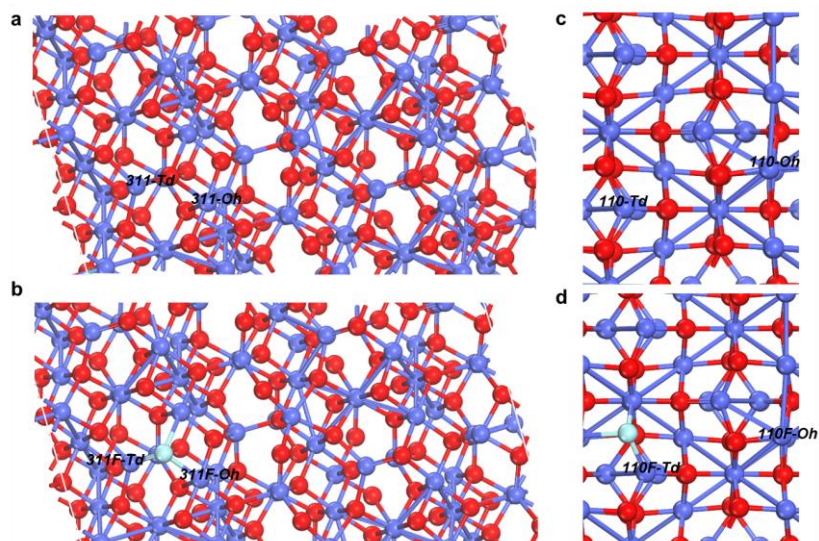

**Fig. S22** The considered active sites for OER on pristine  $\text{Co}_3\text{O}_4$  and  $\text{Co}_3\text{O}_{4-x}\text{F}_x$ . (a) 311-Oh and 311-Td denote the octahedral and tetrahedral Co sites on pristine  $\text{Co}_3\text{O}_4$  (311) surface, respectively. (b) 311F-Oh and 311F-Td denote the octahedral and tetrahedral Co sites on  $\text{Co}_3\text{O}_{4-x}\text{F}_x$  (311) surface, respectively. (c) 110-Oh and 110-Td denote the octahedral and tetrahedral Co sites on pristine  $\text{Co}_3\text{O}_4$  (110) surface, respectively. (d) 110F-Oh and 110F-Td denote the octahedral and tetrahedral Co sites on  $\text{Co}_3\text{O}_{4-x}\text{F}_x$  (110) surface, respectively. Blue, red and cyan balls represent the Co, O and F atoms, respectively.

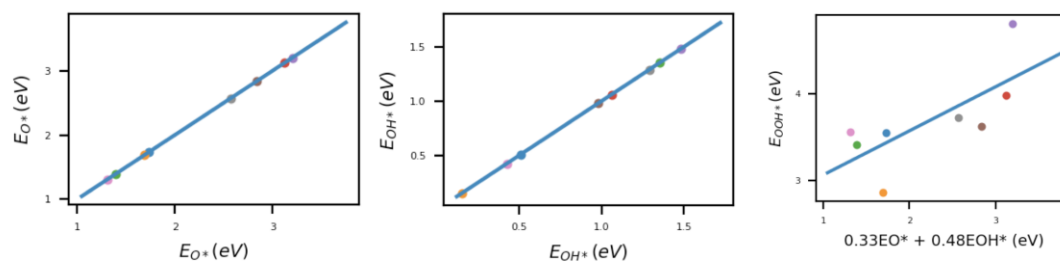

**Fig. S23** The scaling relationship between the adsorption energies of  $O^*$ ,  $OH^*$  and  $OOH^*$  on diverse active sites of pristine  $Co_3O_4$  and  $Co_3O_{4-x}F_x$ .

**Table S1. EXAFS fitting parameters of  $\text{Co}_3\text{O}_{4-x}\text{F}_x$  during the multi-potential steps**

| Sample         | bond type | CN*     | $R$ (Å)   | $\sigma^2$ ( $10^{-3}\text{Å}^2$ )** | R factor |
|----------------|-----------|---------|-----------|--------------------------------------|----------|
| <b>Co-foil</b> | Co-Co     | 12      | 2.49±0.01 | 6.2±0.7                              | 0.007    |
|                | Co-O      | 4.7±0.4 | 1.92±0.01 | 3.2±0.7                              |          |
| <b>initial</b> | Co-Co     | 4.8±0.3 | 2.87±0.01 | 5.6±1.5                              | 0.003    |
|                | Co-Co     | 6.2±0.6 | 3.37±0.01 | 6.4±2.0                              |          |
|                | Co-O      | 4.8±0.4 | 1.92±0.01 | 3.1±0.6                              |          |
| <b>1.3 V</b>   | Co-Co     | 5.1±0.4 | 2.87±0.01 | 5.5±1.5                              | 0.003    |
|                | Co-Co     | 6.5±0.7 | 3.38±0.01 | 6.4±1.3                              |          |
|                | Co-O      | 4.9±0.4 | 1.92±0.01 | 3.1±0.4                              |          |
| <b>1.4 V</b>   | Co-Co     | 5.1±0.2 | 2.87±0.01 | 5.6±1.5                              | 0.002    |
|                | Co-Co     | 6.5±0.3 | 3.38±0.01 | 6.6±1.0                              |          |
|                | Co-O      | 4.8±0.2 | 1.92±0.01 | 3.1±0.3                              |          |
| <b>1.5 V</b>   | Co-Co     | 5.0±0.2 | 2.87±0.01 | 5.6±1.7                              | 0.004    |
|                | Co-Co     | 6.2±0.3 | 3.37±0.01 | 6.4±0.8                              |          |
|                | Co-O      | 4.8±0.2 | 1.92±0.01 | 3.1±0.3                              |          |
| <b>1.6 V</b>   | Co-Co     | 5.0±0.2 | 2.87±0.01 | 5.6±1.5                              | 0.003    |
|                | Co-Co     | 6.4±0.3 | 3.38±0.01 | 6.5±1.6                              |          |
|                | Co-O      | 5.0±0.2 | 1.92±0.01 | 3.1±0.3                              |          |
| <b>1.7 V</b>   | Co-Co     | 6.3±0.2 | 2.86±0.01 | 5.7±1.7                              | 0.003    |
|                | Co-Co     | 6.5±0.3 | 3.38±0.01 | 6.5±2.2                              |          |

\* CN: coordination number;  $S_0^2$  was fixed to be 0.76 from Co-foil.

\*\*  $\sigma^2$ : Debye–Waller factors

**Table S2. EXAFS fitting parameters of Co<sub>3</sub>O<sub>4</sub> during the multi-potential steps**

| Sample         | bond type | CN*     | <i>R</i> (Å) | $\sigma^2$ (10 <sup>-3</sup> Å <sup>2</sup> )** | R factor |
|----------------|-----------|---------|--------------|-------------------------------------------------|----------|
| <b>Co-foil</b> | Co-Co     | 12      | 2.49±0.01    | 6.2±0.7                                         | 0.007    |
|                | Co-O      | 5.2±0.3 | 1.92±0.01    | 3.0±0.4                                         |          |
| <b>initial</b> | Co-Co     | 5.5±0.3 | 2.87±0.01    | 5.4±0.3                                         | 0.006    |
|                | Co-Co     | 7.7±0.5 | 3.37±0.01    | 6.6±0.4                                         |          |
|                | Co-O      | 5.1±0.2 | 1.92±0.01    | 2.9±0.3                                         |          |
| <b>1.3 V</b>   | Co-Co     | 5.4±0.2 | 2.87±0.01    | 5.3±0.3                                         | 0.004    |
|                | Co-Co     | 7.9±0.4 | 3.37±0.01    | 6.5±0.4                                         |          |
|                | Co-O      | 5.2±0.2 | 1.92±0.01    | 2.9±0.3                                         |          |
| <b>1.6 V</b>   | Co-Co     | 5.5±0.2 | 2.87±0.01    | 5.4±0.3                                         | 0.005    |
|                | Co-Co     | 8.1±0.4 | 3.38±0.01    | 6.5±0.4                                         |          |
|                | Co-O      | 5.3±0.2 | 1.92±0.01    | 2.9±0.3                                         |          |
| <b>1.7 V</b>   | Co-Co     | 5.7±0.2 | 2.86±0.01    | 5.3±0.3                                         | 0.004    |
|                | Co-Co     | 8.3±0.4 | 3.37±0.01    | 6.5±0.3                                         |          |

\* CN: coordination number;  $S_0^2$  was fixed to be 0.76 from Co-foil.

\*\*  $\sigma^2$  : Debye–Waller factors

**Table S3. Performance comparison of  $\text{Co}_3\text{O}_{4-x}\text{F}_x$  with the reported non-noble metal based OER catalysts**

| Catalyst                                                   | $\eta_{10}$<br>(mV) | Stability<br>performance        | Electrolyte                    | Refs.     |
|------------------------------------------------------------|---------------------|---------------------------------|--------------------------------|-----------|
| $\text{Co}_3\text{O}_{4-x}\text{F}_x$                      | 349                 | 120 h @100 mA $\text{cm}^{-2}$  | 0.5 M $\text{H}_2\text{SO}_4$  | This work |
| $\text{Co}_{3-x}\text{Ba}_x\text{O}_4$                     | 278                 | 100 h @10 mA $\text{cm}^{-2}$   | 0.5 M $\text{H}_2\text{SO}_4$  | 7         |
| $\text{Co}_3\text{O}_4@\text{C}/\text{GPO}$                | 398                 | 40 h @10 mA $\text{cm}^{-2}$    | 1 M $\text{H}_2\text{SO}_4$    | 8         |
| $\text{Ba}[\text{Co-POM}]/\text{CP}$                       | 361                 | 24 h @1 mA $\text{cm}^{-2}$     | 1 M $\text{H}_2\text{SO}_4$    | 9         |
| $\text{Co}_2\text{TiO}_4$                                  | 513                 | 10 h @1.79 V vs. RHE            | 0.5 M $\text{H}_2\text{SO}_4$  | 10        |
| $\text{Co}_3\text{O}_4\text{-CeO}_2$                       | 423                 | 100 h @10 mA $\text{cm}^{-2}$   | 0.5 M $\text{H}_2\text{SO}_4$  | 11        |
| $\text{CoFePbO}_x$                                         | 700                 | 12 h @12 mA $\text{cm}^{-2}$    | 0.1 M $\text{H}_2\text{SO}_4$  | 12        |
| LMCF                                                       | 353                 | 360 h @10 mA $\text{cm}^{-2}$   | 0.1 M $\text{HClO}_4$          | 13        |
| $\text{Co}_2\text{MnO}_4$ on FTO                           | 395                 | 320 h @100 mA $\text{cm}^{-2}$  | 0.0 M $\text{H}_2\text{SO}_4$  | 14        |
| $\text{Co}_2\text{MnO}_4$ on Pt/Ti mesh                    | 298                 | 1500 h @200 mA $\text{cm}^{-2}$ | 0.5 M $\text{H}_2\text{SO}_4$  | 14        |
| $\gamma\text{-MnO}_2$                                      | ~440                | 1000 h @200 mA $\text{cm}^{-2}$ | 1 M $\text{H}_2\text{SO}_4$    | 15        |
| $\text{Mn}_{7.5}\text{O}_{10}\text{Br}_3$                  | 295±5               | 500 h @10 mA $\text{cm}^{-2}$   | 0.5 M $\text{H}_2\text{SO}_4$  | 16        |
| $\text{Ni}_{0.5}\text{Mn}_{0.5}\text{Sb}_{1.7}\text{O}_y$  | 672±9               | 168 h @10 mA $\text{cm}^{-2}$   | 1 M $\text{H}_2\text{SO}_4$    | 17        |
| $\text{Mn}_{0.8}\text{Nb}_{0.2}\text{O}_2\cdot 10\text{F}$ | 680                 | 25 h @1.9 V vs. RHE             | 0.5 M $\text{H}_2\text{SO}_4$  | 18        |
| NiFeP                                                      | 540                 | 30 h @10 mA $\text{cm}^{-2}$    | 0.05 M $\text{H}_2\text{SO}_4$ | 19        |
| F-doped $\text{Cu}_{1.5}\text{Mn}_{1.5}\text{O}_4$         | 320                 | 24 h @16 mA $\text{cm}^{-2}$    | pH 0.3 $\text{H}_2\text{SO}_4$ | 20        |
| 1T- $\text{MoS}_2$                                         | 420                 | 2 h @10 mA $\text{cm}^{-2}$     | pH 0.3 $\text{H}_2\text{SO}_4$ | 21        |
| NiFe@ $\text{MoS}_2$                                       | 201                 | 100 h @150 mA $\text{cm}^{-2}$  | 0.5 M $\text{H}_2\text{SO}_4$  | 22        |

**Table S4. Total energies for F doping at different site on  $\text{Co}_3\text{O}_4$  (311) surface.  $\text{O}_{2c}$ ,  $\text{O}_{3c}$  and  $\text{O}_{4c}$  denote the 2-fold, 3-fold and 4-fold coordinated oxygen atom. Blue, red, cyan and white balls denote the Co, O, F and H atoms, respectively.**

| <b>Geometry</b>     | <b><math>\text{O}_{2c}</math></b>                                                 | <b><math>\text{O}_{3c}</math></b>                                                  | <b><math>\text{O}_{4c}</math></b>                                                   |
|---------------------|-----------------------------------------------------------------------------------|------------------------------------------------------------------------------------|-------------------------------------------------------------------------------------|
|                     | 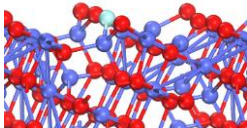 |  |  |
| <b>Total Energy</b> | -1065.107331                                                                      | -1065.190176                                                                       | -1063.808170                                                                        |

**Table S5. Reaction free energy calculations**

| Elementary steps                                                                                      | Free energy ( $\Delta G$ )          |
|-------------------------------------------------------------------------------------------------------|-------------------------------------|
| (R0) $\text{H}_2\text{O}(\text{l}) + * \rightarrow \text{OH}^* + (\text{H}^+ + \text{e}^-)$           | $G_{\text{OH}^*}$                   |
| (R1) $\text{OH}^* \rightarrow \text{O}^* + (\text{H}^+ + \text{e}^-)$                                 | $G_{\text{O}^*} - G_{\text{OH}^*}$  |
| (R2) $\text{O}^* + \text{H}_2\text{O}(\text{l}) \rightarrow \text{OOH}^* + (\text{H}^+ + \text{e}^-)$ | $G_{\text{OOH}^*} - G_{\text{O}^*}$ |
| (R3) $\text{OOH}^* \rightarrow \text{O}_2(\text{g}) + (\text{H}^+ + \text{e}^-)$                      | $4.92 - G_{\text{OOH}^*}$           |
| (R4) $2\text{O}^* \rightarrow \text{O}_2(\text{g}) + 2*$                                              | $4.92 - 2G_{\text{O}^*}$            |

The adsorption free energies of the three adsorbates ( $\text{O}^*$ ,  $\text{OH}^*$  and  $\text{OOH}^*$ ) were calculated with reference to the gas-phase energies of  $\text{H}_2\text{O}$  and  $\text{H}_2$ . The reaction free energy at 0 V versus RHE can be calculated according to the Table S5.

What's more, elementary steps (R0-R3) are electrochemical steps and thus the reaction free energy of these steps is highly influenced by the electrode potential. The free energy of the potential-dependent reaction can be calculated by the computational hydrogen electrode approximation:

$$\Delta G_U = G_{U_0} + e(U - U_0)$$



**Table S6. The corrections of zero-point energy and entropy of adsorbed species. All energies are in eV. (T = 298.15 K)**

| Species<br>Active sites | <b>O*</b> | <b>OH*</b> | <b>OOH*</b> |
|-------------------------|-----------|------------|-------------|
| <b>110-Oh</b>           | 0.07      | 0.40       | 0.40        |
| <b>110-Td</b>           | 0.02      | 0.26       | 0.4         |
| <b>110F-Oh</b>          | 0.07      | 0.40       | 0.40        |
| <b>110F-Td</b>          | 0.02      | 0.26       | 0.4         |
| <b>311-Oh</b>           | 0.05      | 0.32       | 0.40        |
| <b>311-Td</b>           | 0.03      | 0.28       | 0.36        |
| <b>311F-Oh</b>          | 0.04      | 0.32       | 0.40        |
| <b>311F-Td</b>          | 0.03      | 0.28       | 0.36        |

**Table S7. The optimized geometries of O\*, OH\* and OOH\* on diverse active sites.**

Blue, red, green and pink balls denote the Co, O, F and H atoms.

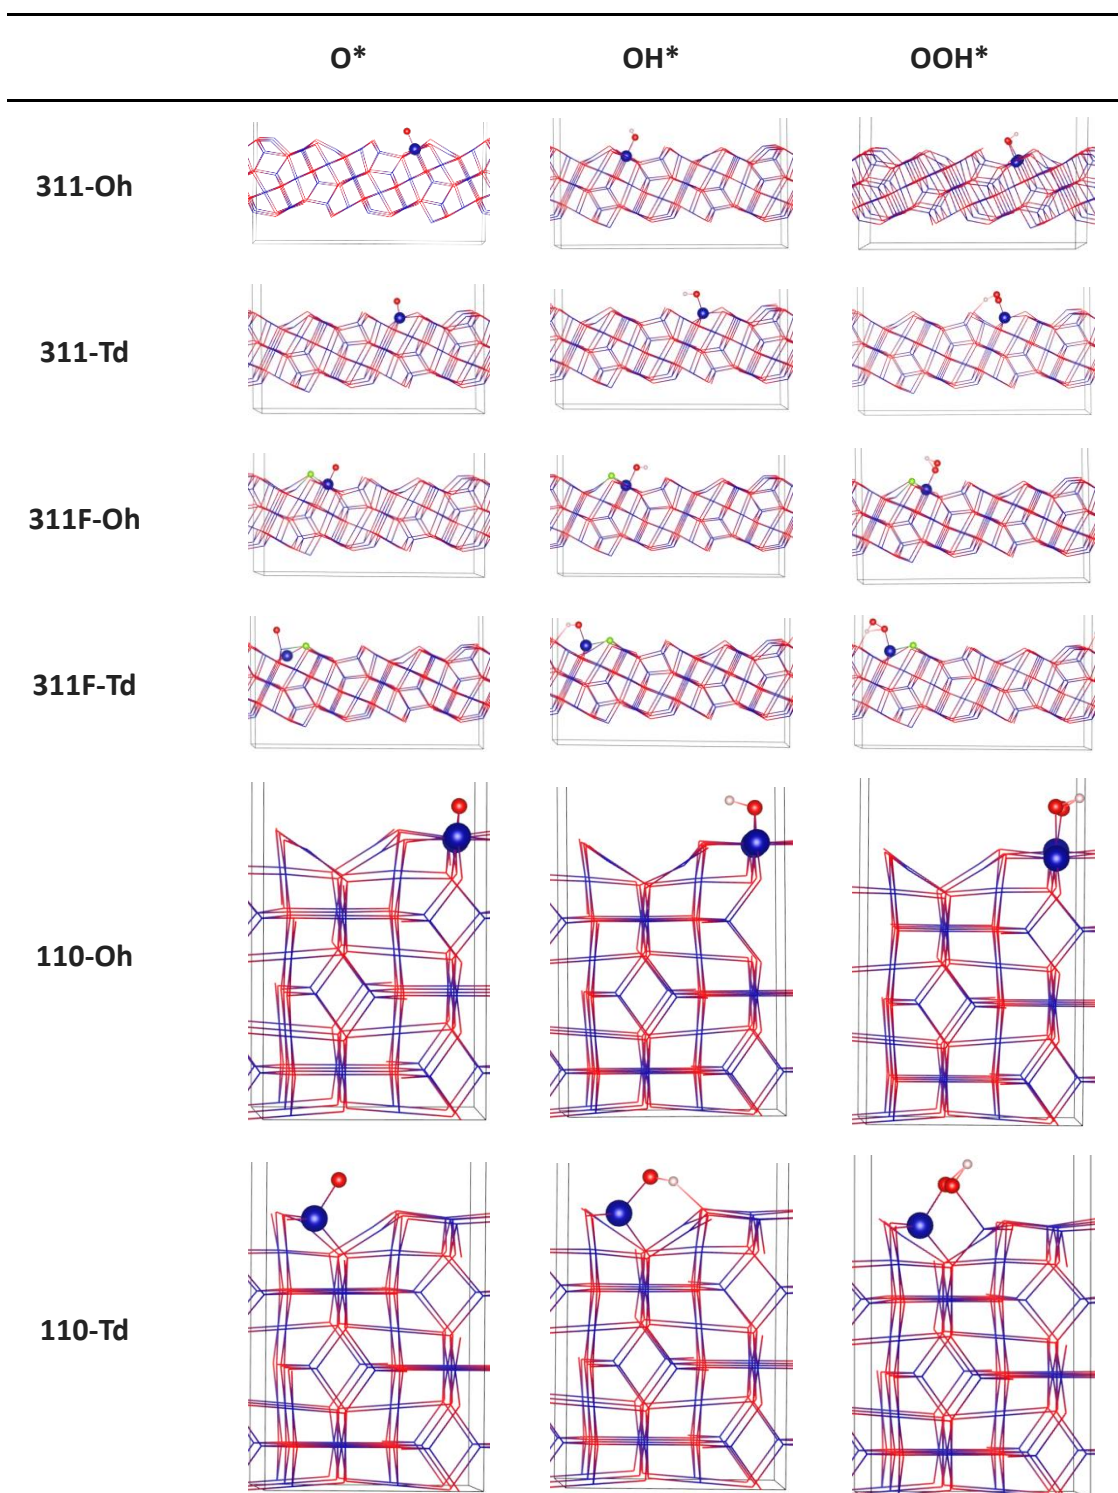

110F-Oh

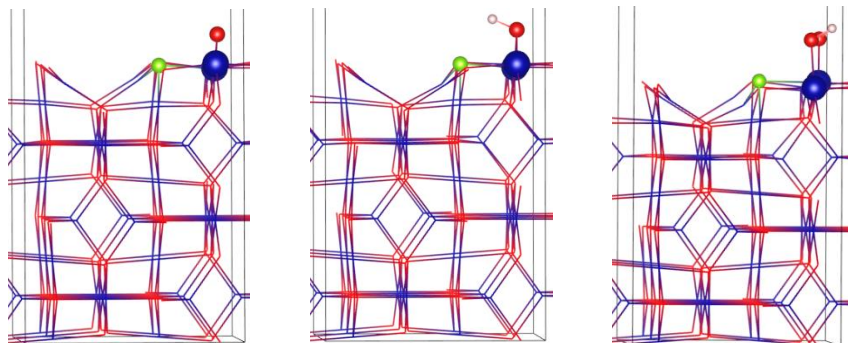

110F-Td

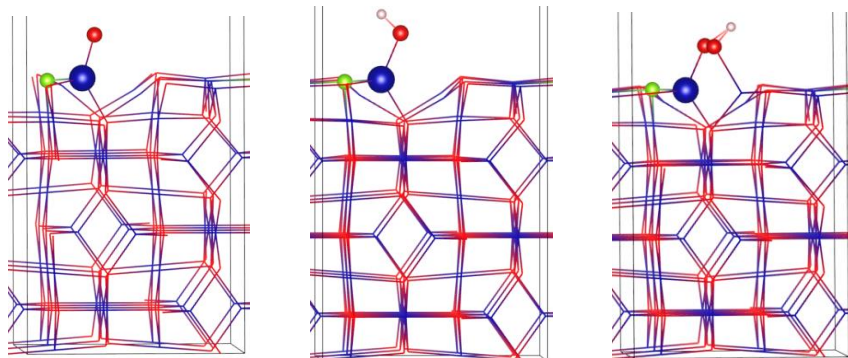

## References

1. G. Kresse and J. Furthmüller, *Comput. Mater. Sci.*, 1996, **6**, 15-50.
2. Y. Zhang and W. Yang, *Phys. Rev. Lett.*, 1998, **80**, 890.
3. F. Zasada, J. Gryboś, P. Indyka, W. Piskorz, J. Kaczmarczyk and Z. Sojka, *J. Phys. Chem. C*, 2014, **118**, 19085–19097.
4. M. Methfessel and A. T. Paxton, *Phys. Rev. B*, 1989, **40**, 3616-3621.
5. K. Mathew, V. S. C. Kolluru, S. Mula, S. N. Steinmann and R. G. Hennig, *J. Chem. Phys.*, 2019, **151**, 234101.
6. K. Mathew, R. Sundararaman, K. Letchworth-Weaver, T. A. Arias and R. G. Hennig, *J. Chem. Phys.*, 2014, **140**, 084106.
7. N. Wang, P. Ou, R. K. Miao, Y. Chang, Z. Wang, S. F. Hung, J. Abed, A. Ozden, H. Y. Chen, H. L. Wu, J. E. Huang, D. Zhou, W. Ni, L. Fan, Y. Yan, T. Peng, D. Sinton, Y. Liu, H. Liang and E. H. Sargent, *J. Am. Chem. Soc.*, 2023, **145**, 7829-7836.
8. J. Yu, F. A. Garces-Pineda, J. Gonzalez-Cobos, M. Pena-Diaz, C. Rogero, S. Gimenez, M. C. Spadaro, J. Arbiol, S. Barja and J. R. Galan-Mascaros, *Nat. Commun.*, 2022, **13**, 4341.
9. M. Blasco-Ahicart, J. Soriano-Lopez, J. J. Carbo, J. M. Poblet and J. R. Galan-Mascaros, *Nat. Chem.*, 2018, **10**, 24-30.
10. S. Anantharaj, K. Karthick and S. Kundu, *Inorg. Chem.*, 2019, **58**, 8570-8576.
11. J. Huang, H. Sheng, R. D. Ross, J. Han, X. Wang, B. Song and S. Jin, *Nat. Commun.*, 2021, **12**, 3036.
12. M. Chatti, J. L. Gardiner, M. Fournier, B. Johannessen, T. Williams, T. R. Gengenbach, N. Pai, C. Nguyen, D. R. MacFarlane, R. K. Hocking and A. N. Simonov, *Nat. Catal.*, 2019, **2**, 457-465.
13. L. Chong, G. Gao, J. Wen, H. Li, H. Xu, Z. Green, J. D. Sugar, A. J. Kropf, W. Xu, X.-M. Lin, H. Xu, L.-W. Wang and D.-J. Liu, *Science*, 2023, **380**, 609-616.
14. A. Li, S. Kong, C. Guo, H. Ooka, K. Adachi, D. Hashizume, Q. Jiang, H. Han, J. Xiao and R. Nakamura, *Nat. Catal.*, 2022, **5**, 109-118.
15. S. Kong, A. Li, J. Long, K. Adachi, D. Hashizume, Q. Jiang, K. Fushimi, H. Ooka, J.

Xiao and R. Nakamura, *Nat. Catal.*, 2024, **7**, 252-261.

16. S. Pan, H. Li, D. Liu, R. Huang, X. Pan, D. Ren, J. Li, M. Shakouri, Q. Zhang, M. Wang, C. Wei, L. Mai, B. Zhang, Y. Zhao, Z. Wang, M. Graetzel and X. Zhang, *Nat. Commun.*, 2022, **13**, 2294.

17. I. A. Moreno-Hernandez, C. A. MacFarland, C. G. Read, K. M. Papadantonakis, B. S. Brunshwig and N. S. Lewis, *Energy Environ. Sci.*, 2017, **10**, 2103-2108.

18. S. D. Ghadge, O. I. Velikokhatnyi, M. K. Datta, P. M. Shanthi, S. Tan and P. N. Kumta, *ACS Appl. Energy Mater.*, 2019, **3**, 541-557.

19. F. Hu, S. Zhu, S. Chen, Y. Li, L. Ma, T. Wu, Y. Zhang, C. Wang, C. Liu, X. Yang, L. Song, X. Yang and Y. Xiong, *Adv. Mater.*, 2017, **29**, 1606570.

20. P. P. Patel, M. K. Datta, O. I. Velikokhatnyi, R. Kuruba, K. Damodaran, P. Jampani, B. Gattu, P. M. Shanthi, S. S. Damle and P. N. Kumta, *Sci. Rep.*, 2016, **6**, 28367.

21. J. Wu, M. Liu, K. Chatterjee, K. P. Hackenberg, J. Shen, X. Zou, Y. Yan, J. Gu, Y. Yang, J. Lou and P. M. Ajayan, *Adv. Mater. Interfaces*, 2016, **3**, 1500669.

22. Z. Jiang, W. Zhou, C. Hu, X. Luo, W. Zeng, X. Gong, Y. Yang, T. Yu, W. Lei and C. Yuan, *Adv. Mater.*, 2023, **35**, 2300505.
